# Supplementary material
Source: HighWire-hosted journal article supplement (https://fg.bmj.com/highwire/filestream/143644/field_highwire_adjunct_files/4/flgastro-2021-101994supp005_data_supplement.pdf)

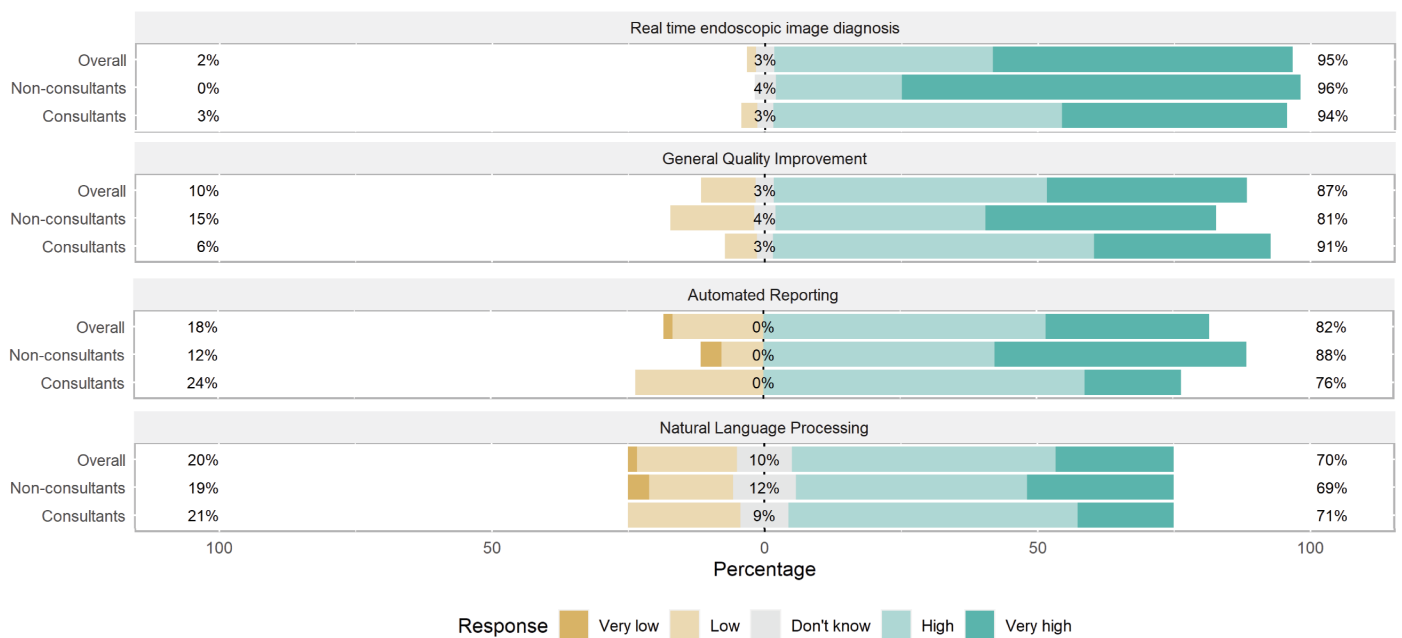

Supplement: flgastro-2021-101994supp005_data_supplement.pdf [file flgastro-2021-101994supp005_data_supplement.pdf]
